# Supplementary material
Source: Springer Nature journal article supplement (https://www.springermedizin.de/resource/supplementary/12936_2008_620_MOESM6_ESM.pdf/9547840)
Supplement: MOESM6 [file 9547840]

**Children under the age five years who slept under a mosquito net the night before the survey and children who slept under an Insecticide Treated Net (ITN), by background characteristics**

| Background characteristic                     | Children under age five years who slept under a net last night | P-value for $\chi^2$ | Children under age five years who slept under an ITN last night | P-value for $\chi^2$ | Eligible children |
|-----------------------------------------------|----------------------------------------------------------------|----------------------|-----------------------------------------------------------------|----------------------|-------------------|
|                                               | % (n=411)                                                      |                      | % (n=61)                                                        |                      | (n=3585)          |
| <i>Age (in years)</i>                         |                                                                |                      |                                                                 |                      |                   |
| <1                                            | 11.5 (68)                                                      | 0.029                | 1.7 (10)                                                        | 0.296                | 589               |
| 1                                             | 14.5 (107)                                                     |                      | 2.6 (19)                                                        |                      | 740               |
| 2                                             | 10.9 (85)                                                      |                      | 1.8 (14)                                                        |                      | 780               |
| 3                                             | 12.2 (89)                                                      |                      | 1.4 (10)                                                        |                      | 731               |
| 4                                             | 9.1 (62)                                                       |                      | 1.2 (8)                                                         |                      | 685               |
| Total                                         | 11.7 (411)                                                     |                      | 1.7 (61)                                                        |                      | 3525              |
| <i>Gender</i>                                 |                                                                |                      |                                                                 |                      |                   |
| Male                                          | 11.9 (208)                                                     | 0.36                 | 1.8 (31)                                                        | 0.58                 | 1754              |
| Female                                        | 10.9 (178)                                                     |                      | 1.5 (25)                                                        |                      | 1639              |
| Total                                         | 11.4 (386)                                                     |                      | 1.7 (56)                                                        |                      | 3393              |
| <i>Region</i>                                 |                                                                |                      |                                                                 |                      |                   |
| South west                                    | 12.5 (87)                                                      | <0.0001              | 2.4 (17)                                                        | 0.037                | 698               |
| South east                                    | 16.0 (107)                                                     |                      | 2.5 (17)                                                        |                      | 668               |
| South south                                   | 8.3 (27)                                                       |                      | .09 (3)                                                         |                      | 327               |
| North west                                    | 10.8 (78)                                                      |                      | 1.9 (14)                                                        |                      | 721               |
| North east                                    | 14.5(61)                                                       |                      | 1.4 (6)                                                         |                      | 422               |
| North central                                 | 7.3 (51)                                                       |                      | 0.6 (4)                                                         |                      | 697               |
| Total                                         | 11.6 (411)                                                     |                      | 1.7 (61)                                                        |                      | 3533              |
| <i>Residence</i>                              |                                                                |                      |                                                                 |                      |                   |
| Urban                                         | 9.9 (130)                                                      | 0.026                | 1.8 (23)                                                        | 0.468                | 1308              |
| Rural                                         | 12.4 (259)                                                     |                      | 1.4 (30)                                                        |                      | 2082              |
| Total                                         | 11.5 (389)                                                     |                      | 1.6 (53)                                                        |                      | 3390              |
| <i>Caregiver's education level</i>            |                                                                |                      |                                                                 |                      |                   |
| None                                          | 8.9 (84)                                                       | <0.0001              | 1.0 (9)                                                         | 0.0003               | 942               |
| Primary                                       | 10.4 (106)                                                     |                      | 1.1 (11)                                                        |                      | 1022              |
| Secondary                                     | 12.1 (128)                                                     |                      | 2.0 (21)                                                        |                      | 1062              |
| Higher                                        | 25.3 (76)                                                      |                      | 4.3 (13)                                                        |                      | 300               |
| Total                                         | 11.8 (394)                                                     |                      | 1.9 (45)                                                        |                      | 3326              |
| <i>Caregiver's religion</i>                   |                                                                |                      |                                                                 |                      |                   |
| Islam                                         | 10.2 (119)                                                     | 0.12                 | 0.7 (8)                                                         | 0.005                | 1164              |
| Christianity                                  | 12.7 (270)                                                     |                      | 2.2 (46)                                                        |                      | 2126              |
| Other                                         | 4.5 (1)                                                        |                      | 0.0 (0)                                                         |                      | 24                |
| Total                                         | 11.5 (390)                                                     |                      | 1.6 (54)                                                        |                      | 3314              |
| <i>Household wealth index (combined data)</i> |                                                                |                      |                                                                 |                      |                   |
| Lowest                                        | 9.3 (77)                                                       | 0.004                | 1.5 (12)                                                        | 0.003                | 824               |
| 2nd Quartile                                  | 12.9 (109)                                                     |                      | 1.9 (16)                                                        |                      | 847               |
| 3rd Quartile                                  | 10.1 (98)                                                      |                      | 0.7 (7)                                                         |                      | 970               |
| Highest                                       | 14.3 (126)                                                     |                      | 2.9 (26)                                                        |                      | 884               |
| Total                                         | 11.6 (410)                                                     |                      | 1.7 (61)                                                        |                      | 3524              |
| <i>Urban household wealth index</i>           |                                                                |                      |                                                                 |                      |                   |
|                                               | (n=130)                                                        |                      | (n=23)                                                          |                      | (n=1308)          |
| Lowest                                        | 8.7 (32)                                                       | 0.399                | 1.4 (5)                                                         | 0.108                | 367               |
| 2nd Quartile                                  | 9.3 (37)                                                       |                      | 1.3 (5)                                                         |                      | 398               |
| 3rd Quartile                                  | 10.0 (25)                                                      |                      | 3.6 (9)                                                         |                      | 249               |
| Highest                                       | 12.5 (36)                                                      |                      | 1.4 (4)                                                         |                      | 287               |
| Total                                         | 10.0 (130)                                                     |                      | 1.8 (23)                                                        |                      | 1301              |
| <i>Rural household wealth index</i>           |                                                                |                      |                                                                 |                      |                   |
|                                               | (n=259)                                                        |                      | (n=30)                                                          |                      | (n=2082)          |
| Lowest                                        | 10.4 (56)                                                      | 0.331                | 1.3 (7)                                                         | 0.08                 | 536               |
| 2nd Quartile                                  | 12.8 (71)                                                      |                      | 1.6 (9)                                                         |                      | 553               |
| 3rd Quartile                                  | 12.2 (59)                                                      |                      | 0.4 (2)                                                         |                      | 482               |
| Highest                                       | 14.1 (72)                                                      |                      | 2.4 (12)                                                        |                      | 510               |
| Total                                         | 12.4 (258)                                                     |                      | 1.4 (30)                                                        |                      | 2081              |
